# Supplementary material for: Preparation of graphene via wet ball milling and in situ reversible modification with the Diels–Alder reaction
Source: Royal Society of Chemistry journal article supplement (doi:10.1039/c9nj05309c), 2019-12-16
Supplement: c9nj05309c1.pdf [file c9nj05309c1.pdf]

## Supporting Information

### Preparation of graphene via wet ball milling and in situ reversible modification with Diels-Alder reaction

*Jianfeng Xu, Xiaomin Zhao, Feixiang Liu, Lun Jin, Guohua Chen\**

College of Materials Science and Engineering, Huaqiao University, 668 Jimei Blvd, Xiamen, Fujian, 361000,  
PR China.

\*Corresponding author: Tel: +86 05926162280; E-mail address: hdcgh@hqu.edu.cn (G.H. Chen)

**Fig. S1:** The variation of C atomic hybridized orbital in D-A reaction and reverse D-A reaction.

**Fig. S2:** AFM image of G-MA (left) and analysis of each graphene sheets a-d (right)

**Fig. S3:** The images of G-MA contact angle (a), G-NMP (b), and graphite (c).

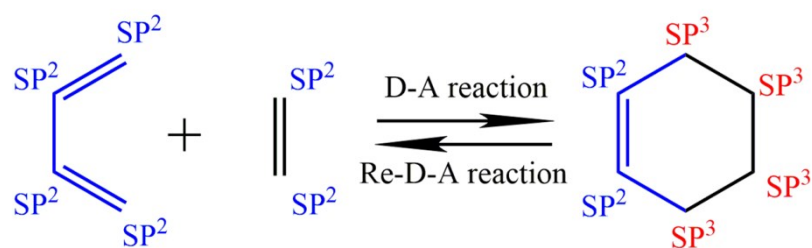

**Fig. S1:** The variation of C atomic hybridized orbital in D-A reaction and reverse D-A reaction.

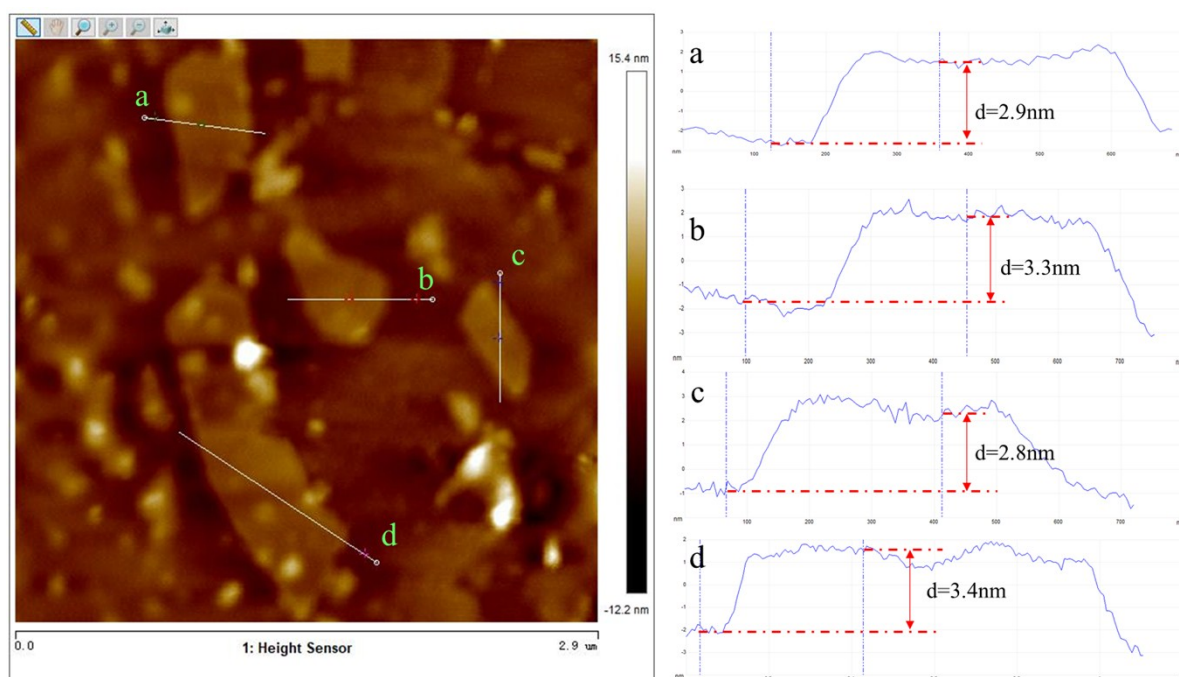

**Fig. S2:** AFM image of G-MA (left) and analysis of each graphene sheets a-d (right).

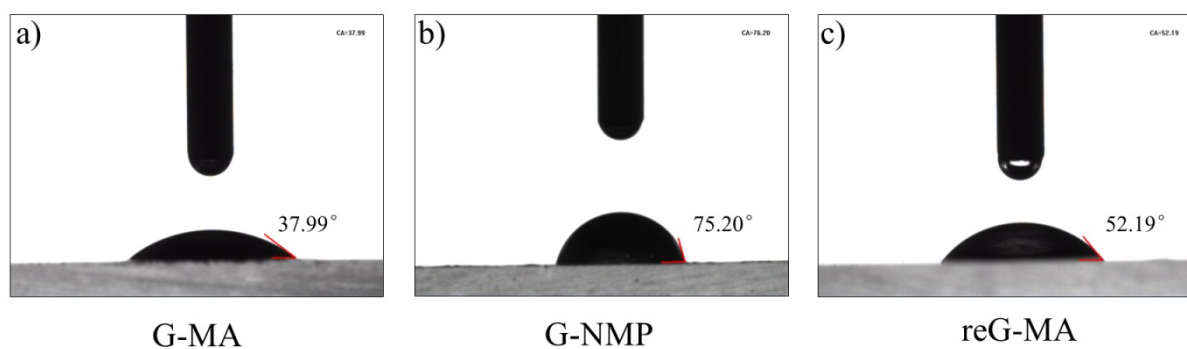

**Fig. S3:** The images of G-MA contact angle (a), G-NMP (b), and reG-MA(c).
